# Supplementary material for: Brazilian network for HIV Drug Resistance Surveillance (HIV‐BresNet): a survey of treatment‐naive individuals
Source: PubMed Central journal article supplement (PMC5835841; doi:10.1002/jia2.25032), 2018-03-05
Supplement: JIA2-21-e25032-s001.pdf [file JIA2-21-e25032-s001.pdf]

Supplementary material 1: Distribution of samples stratified in the five majors Brazilian geographic regions

| <b>Brazilian geographic regions</b> | <b>States</b>       | <b>Number of calculated samples</b> | <b>Number of processed samples</b> |
|-------------------------------------|---------------------|-------------------------------------|------------------------------------|
| <b>NORTH</b>                        | Acre                | 4                                   | 5                                  |
|                                     | Amazonas            | 72                                  | 81                                 |
|                                     | Amapá               | 9                                   | 10                                 |
|                                     | Pará                | 111                                 | 107                                |
|                                     | Rondônia            | 31                                  | 29                                 |
|                                     | Roraima             | 10                                  | 12                                 |
|                                     | Tocantins           | 17                                  | 21                                 |
| Total                               |                     | 254                                 | 265                                |
| <b>NORTHEAST</b>                    | Alagoas             | 13                                  | 17                                 |
|                                     | Bahia               | 55                                  | 62                                 |
|                                     | Ceará               | 28                                  | 34                                 |
|                                     | Maranhão            | 28                                  | 31                                 |
|                                     | Paraíba             | 16                                  | 19                                 |
|                                     | Pernambuco          | 71                                  | 66                                 |
|                                     | Piauí               | 15                                  | 7                                  |
|                                     | Rio Grande do Norte | 15                                  | 16                                 |
| Sergipe                             | 13                  | 13                                  |                                    |
| Total                               |                     | 254                                 | 265                                |
| <b>CENTRAL-WEST</b>                 | Distrito Federal    | 52                                  | 60                                 |
|                                     | Goiás               | 81                                  | 63                                 |
|                                     | Mato Grosso do Sul  | 54                                  | 62                                 |
|                                     | Mato Grosso         | 66                                  | 80                                 |
| Total                               |                     | 253                                 | 265                                |
| <b>SOUTH</b>                        | Paraná              | 55                                  | 51                                 |
|                                     | Rio Grande do Sul   | 151                                 | 173                                |
|                                     | Santa Catarina      | 49                                  | 49                                 |
| Total                               |                     | 255                                 | 273                                |
| <b>SOUTHEAST</b>                    | Espírito Santo      | 15                                  | 22                                 |
|                                     | Minas Gerais        | 89                                  | 89                                 |
|                                     | Rio de Janeiro      | 136                                 | 191                                |
|                                     | São Paulo           | 263                                 | 198                                |
| Total                               |                     | 503                                 | 500                                |

## Supplementary material 2:Prevalence of drug resistance according to State

| <b>Brazilian geographic regions</b> | <b>States</b>       | <b>Number of Sequences</b> | <b>Number of Sequences with any SDRM (%)</b> |
|-------------------------------------|---------------------|----------------------------|----------------------------------------------|
| <b>NORTH</b>                        | Acre                | 5                          | 0                                            |
|                                     | Amazonas            | 81                         | 7(8.5)                                       |
|                                     | Amapá               | 10                         | 0                                            |
|                                     | Pará                | 107                        | 12(11.6)                                     |
|                                     | Rondônia            | 29                         | 4(13.8)                                      |
|                                     | Roraima             | 12                         | 1(8.3)                                       |
|                                     | Tocantins           | 21                         | 3(14.4)                                      |
| <b>Total</b>                        |                     | <b>265</b>                 | <b>27(10.2)</b>                              |
| <b>NORTHEAST</b>                    | Alagoas             | 17                         | 0                                            |
|                                     | Bahia               | 59                         | 5(8.5)                                       |
|                                     | Ceará               | 34                         | 8(23.5)                                      |
|                                     | Maranhão            | 32                         | 2(6.2)                                       |
|                                     | Paraíba             | 21                         | 1(4.8)                                       |
|                                     | Pernambuco          | 66                         | 5(7.6)                                       |
|                                     | Piauí               | 7                          | 2(28.6)                                      |
|                                     | Rio Grande do Norte | 16                         | 0                                            |
| Sergipe                             | 13                  | 2(15.4)                    |                                              |
| <b>Total</b>                        |                     | <b>265</b>                 | <b>25(9.4)</b>                               |
| <b>CENTRAL-WEST</b>                 | Distrito Federal    | 60                         | 4(6.7)                                       |
|                                     | Goiás               | 63                         | 4(6.3)                                       |
|                                     | Mato Grosso do Sul  | 62                         | 4(6.5)                                       |
|                                     | Mato Grosso         | 80                         | 6(7.5)                                       |
| <b>Total</b>                        |                     | <b>265</b>                 | <b>18(6.8)</b>                               |
| <b>SOUTH</b>                        | Paraná              | 51                         | 3(5.9)                                       |
|                                     | Rio Grande do Sul   | 173                        | 17(9.8)                                      |
|                                     | Santa Catarina      | 49                         | 4(8.2)                                       |
| <b>Total</b>                        |                     | <b>273</b>                 | <b>24(8.8)</b>                               |
| <b>SOUTHEAST</b>                    | Espírito Santo      | 22                         | 1(4.5)                                       |
|                                     | Minas Gerais        | 89                         | 9(10.1)                                      |
|                                     | Rio de Janeiro      | 191                        | 18(9.4)                                      |
|                                     | São Paulo           | 198                        | 28(14.1)                                     |
| <b>Total</b>                        |                     | <b>500</b>                 | <b>56(11,2)</b>                              |
